# Supplementary material
Source: PubMed Central journal article supplement (PMC6195837)
Supplement: NIHMS984019-supplement-Supp_info.pdf [file NIHMS984019-supplement-Supp_info.pdf]

## SUPPORTING INFORMATION

### **Feedback regulation of *Caulobacter crescentus* holdfast synthesis by flagellum assembly via the holdfast inhibitor HfiA.**

Cécile Berne\*<sup>1</sup>, Courtney K. Ellison\*<sup>1</sup>, Radhika Agarwal<sup>1,2</sup>, Geoffrey B. Severin<sup>3</sup>, Aretha Fiebig<sup>4</sup>, Robert I. Morton III<sup>1</sup>, Christopher M. Waters<sup>5</sup>, and Yves V. Brun #<sup>1</sup>

<sup>1</sup> Department of Biology, Indiana University, 1001 E. 3<sup>rd</sup> Street, Bloomington, IN 47405

<sup>2</sup> Present address: Department of Genetics, Harvard Medical School, Boston, MA 02115

<sup>3</sup> Department of Biochemistry and Molecular Biology, Michigan State University, East Lansing, MI, USA

<sup>4</sup> Department of Biochemistry and Molecular Biology, University of Chicago, Chicago, Illinois, USA

<sup>5</sup> Department of Microbiology and Molecular Genetics, Michigan State University, East Lansing, MI, USA

\* these authors contributed equally

# corresponding author: [ybrun@indiana.edu](mailto:ybrun@indiana.edu)

Supplementary Table S1 (Bacterial strains and plasmids used in this study)

Supplementary Table S2 (PCR primers used in this study)

Supplementary Movie Legend

Supplementary References

Supplementary Figures S1 to S4

**TABLE S1: Bacterial strains and plasmids used in this study**

| Strain                            | Description or construction                                                                       | Source or reference             |
|-----------------------------------|---------------------------------------------------------------------------------------------------|---------------------------------|
| <b><i>E. coli</i> strains</b>     |                                                                                                   |                                 |
| YB4026                            | S17-1 / pNPTS138 $\Delta$ <i>flgE</i>                                                             | This study                      |
| YB4030                            | S17-1 / pNPTS138 $\Delta$ <i>pilA</i>                                                             | This study                      |
| YB4648                            | S17-1 / pNPTS138 $\Delta$ <i>motA</i>                                                             | This study                      |
| YB4029                            | S17-1 / pNPTS138 $\Delta$ <i>motB</i>                                                             | This study                      |
| FC1268                            | TOP10 / pNPTS138 $\Delta$ <i>flgH</i>                                                             | This study                      |
| UJ278                             | DH10B / pNPTS138 $\Delta$ <i>divK</i> $\Delta$ <i>pleD</i>                                        | (Aldridge <i>et al.</i> , 2003) |
| YB5673                            | $\alpha$ Select / pNPST139 <i>fljKT</i> 176C                                                      | This study                      |
| YB6566                            | $\alpha$ Select / pNPST139 <i>fljKT</i> 103C                                                      | This study                      |
| <b><i>Caulobacter</i> strains</b> |                                                                                                   |                                 |
| YB135 <sup>1</sup>                | CB15 WT                                                                                           | (Poindexter, 1964)              |
| YB4037                            | CB15 $\Delta$ <i>motB</i>                                                                         | This study                      |
| YB4800                            | CB15 $\Delta$ <i>motA</i>                                                                         | This study                      |
| YB4036                            | CB15 $\Delta$ <i>flgE</i>                                                                         | This study                      |
| YB4251                            | CB15 $\Delta$ <i>hfaB</i>                                                                         | (Hardy <i>et al.</i> , 2010)    |
| FC1365                            | CB15 $\Delta$ <i>hfiA</i>                                                                         | (Fiebig <i>et al.</i> , 2014)   |
| YB5283                            | CB15 $\Delta$ <i>hfiA</i> $\Delta$ <i>flgE</i>                                                    | This study                      |
| YB4038                            | CB15 $\Delta$ <i>pilA</i>                                                                         | This study                      |
| YB5086                            | CB15 $\Delta$ <i>pilA</i> $\Delta$ <i>flgE</i>                                                    | This study                      |
| YB2857                            | CB15 $\Delta$ <i>hfsDAB</i>                                                                       | (Hardy <i>et al.</i> , 2010)    |
| FC1365                            | CB15 $\Delta$ <i>hfiA</i>                                                                         | (Fiebig <i>et al.</i> , 2014)   |
| YB5284                            | CB15 $\Delta$ <i>hfiA</i> $\Delta$ <i>flgE</i>                                                    | This study                      |
| YB7356                            | CB15 $\Delta$ <i>pleD</i>                                                                         | This study                      |
| YB7358                            | CB15 $\Delta$ <i>pleD</i> $\Delta$ <i>flgE</i>                                                    | This study                      |
| YB8944                            | CB15 WT pMT630                                                                                    | This study                      |
| YB8947                            | CB15 $\Delta$ <i>motB</i> pMT630                                                                  | This study                      |
| YB8948                            | CB15 $\Delta$ <i>motB</i> pMT630- <i>motB</i>                                                     | This study                      |
| YB8949                            | CB15 $\Delta$ <i>pleD</i> pMT630                                                                  | This study                      |
| YB8950                            | CB15 $\Delta$ <i>pleD</i> pMT630- <i>pleD</i>                                                     | This study                      |
| YB8951                            | CB15 WT pMR10                                                                                     | This study                      |
| YB8945                            | CB15 $\Delta$ <i>flgE</i> pMR10                                                                   | This study                      |
| YB8946                            | CB15 $\Delta$ <i>flgE</i> pMR10- <i>flgE</i>                                                      | This study                      |
| FC1399                            | CB15 <i>xyl</i> ::pMT680- <i>hfiA</i>                                                             | (Fiebig <i>et al.</i> , 2014)   |
| YB7984                            | CB15 $\Delta$ <i>motB</i> <i>xyl</i> ::pMT680- <i>hfiA</i>                                        | This study                      |
| YB7985                            | CB15 $\Delta$ <i>flgE</i> <i>xyl</i> ::pMT680- <i>hfiA</i>                                        | This study                      |
| YB8937                            | CB15 pMT335                                                                                       | This study                      |
| YB8938                            | CB15 $\Delta$ <i>flgE</i> pMT335                                                                  | This study                      |
| YB8939                            | CB15 $\Delta$ <i>motB</i> pMT335                                                                  | This study                      |
| YB8940                            | CB15 pBV-PA5295                                                                                   | This study                      |
| YB8941                            | CB15 $\Delta$ <i>flgE</i> pBV-PA5295                                                              | This study                      |
| YB8942                            | CB15 $\Delta$ <i>motB</i> pBV-PA5295                                                              | This study                      |
| UJ5100                            | CB15 cdG0                                                                                         | (Abel <i>et al.</i> , 2013)     |
| UJ8732                            | CB15 rcdG0                                                                                        | (Sprecher <i>et al.</i> , 2017) |
| YB8243                            | CB15 / pRKlac290                                                                                  | This study                      |
| FC1949                            | CB15 / pRKlac290- <i>PhfiA</i> (pAF427)                                                           | (Fiebig <i>et al.</i> , 2014)   |
| FC1951                            | CB15 <i>xyl</i> ::pMT585- <i>lovR</i> <i>vanR</i> ::pMT528- <i>lovK</i> / pRKlac290- <i>PhfiA</i> | (Fiebig <i>et al.</i> , 2014)   |
| YB8820                            | CB15 $\Delta$ <i>motB</i> / pRKlac290- <i>PhfiA</i>                                               | This study                      |

|                    |                                                          |                              |
|--------------------|----------------------------------------------------------|------------------------------|
| YB8819             | CB15 $\Delta flgE$ / pRKlac290- <i>PhfiA</i>             | This study                   |
| YB7986             | CB15 $\Delta pleD$ / pRKlac290- <i>PhfiA</i>             | This study                   |
| YB7987             | CB15 $\Delta pleD \Delta flgE$ / pRKlac290- <i>PhfiA</i> | This study                   |
| ACC147             | CB15 $\Delta flgH$ / pRKlac290- <i>PhfiA</i>             | This study                   |
| YB8952             | CB15 pMT335 / pRKlac290- <i>PhfiA</i>                    | This study                   |
| YB8953             | CB15 $\Delta flgE$ pBV-PA5295 / pRKlac290- <i>PhfiA</i>  | This study                   |
| YB8954             | CB15 $\Delta motB$ pBV-PA5295 / pRKlac290- <i>PhfiA</i>  | This study                   |
| YB8955             | CB15 rcdG0 / pRKlac290- <i>PhfiA</i>                     | This study                   |
| SC1131             | CB15 <i>fliM::Tn5</i>                                    | (Ely & Ely, 1989)            |
| FC1266             | CB15 $\Delta flgH$                                       | This study                   |
| FC764 <sup>1</sup> | NA1000 <i>hfsA</i> <sup>+</sup> WT                       | (Marks <i>et al.</i> , 2010) |
| YB6375             | NA1000 <i>hfsA</i> <sup>+</sup> $\Delta flgE$            | This study                   |
| YB7377             | NA1000 <i>hfsA</i> <sup>+</sup> $\Delta motB$            | This study                   |
| YB8826             | NA1000 <i>hfsA</i> <sup>+</sup> $\Delta pleD$            | This study                   |
| YB6562             | NA1000 <i>hfsA</i> <sup>+</sup> FljKT103C                | This study                   |
| YB6564             | NA1000 <i>hfsA</i> <sup>+</sup> FljKT176C                | This study                   |

### Plasmids

|                     |                                                                                                       |                                    |
|---------------------|-------------------------------------------------------------------------------------------------------|------------------------------------|
| pNPTS138            | Litmus 38 derivative, <i>oriT sacB Kan</i> <sup>r</sup>                                               | M.R.K Alley                        |
| pNPTS139            | Litmus 39 derivative, <i>oriT sacB Kan</i> <sup>r</sup>                                               | M.R.K Alley                        |
| pNPTSmotA           | pNPTS138 containing 480 bp fragments upstream and downstream of <i>motA</i>                           | This study                         |
| pNPTSmotB           | pNPTS138 containing 480 bp fragments upstream and downstream of <i>motB</i>                           | This study                         |
| pNPTSflgE           | pNPTS138 containing 480 bp fragments upstream and downstream of <i>flgE</i>                           | This study                         |
| pNPTSpilA           | pNPTS138 containing 480 bp fragments upstream and downstream of <i>pilA</i>                           | This study                         |
| pPA24               | pNPTS138 <i>divK</i> $\Delta pleD$                                                                    | (Aldridge & Jenal, 1999)           |
| pNPTSFljKT103C      | pNPTS139 containing 753-bp of <i>fliK</i> with a T to C point mutation at 103 bp from the start codon | This study                         |
| pNPTSFljKT176C      | pNPTS139 containing 753-bp of <i>fliK</i> with a T to C point mutation at 176 bp from the start codon | This study                         |
| pMT630              | Low copy replicating plasmid, vanillate inducible (Kn)                                                | (Thanbichler <i>et al.</i> , 2007) |
| pMT630- <i>motB</i> | <i>motB</i> under control of the vanillate promoter in pMT630                                         | This study                         |
| pMT630- <i>pleD</i> | <i>pleD</i> under control of the vanillate promoter in pMT630                                         | This study                         |
| pMT335              | High copy replicating plasmid, vanillate inducible (Gm)                                               | (Thanbichler <i>et al.</i> , 2007) |
| pBV-PA5295          | PA5295 under control of the vanillate promoter in pMT335                                              | (Duerig <i>et al.</i> , 2009)      |
| pMR10               | Mid copy replicating plasmid, IPTG inducible (constitutive in <i>C. crescentus</i> ) (Kn)             | (Roberts <i>et al.</i> , 1996)     |
| pMR10- <i>flgE</i>  | <i>flgE</i> under control of the <i>lac</i> promoter in pMR10                                         | This study                         |
| pRKlac290           | plasmid for <i>lacZ</i> transcriptional fusions (Tet)                                                 | (Gober & Shapiro, 1992)            |
| pAF427              | pRKlac290- <i>PhfiA</i>                                                                               | (Fiebig <i>et al.</i> , 2014)      |
| pMT680              | Integrating plasmid at the xylose locus (Chlor)                                                       | (Thanbichler <i>et al.</i> , 2007) |
| pMT680- <i>hfiA</i> | <i>hfiA</i> under control of the xylose promoter in pMT680, integration at the xylose locus           | (Fiebig <i>et al.</i> , 2014)      |

<sup>1</sup> These two strains and their  $\Delta flgE$  and  $\Delta motB$  derivatives have the same adhesion phenotypes.

**TABLE S2: PCR primers used in this study**

| Primer                                                         | Sequence (5' – 3')                        | Function                              |
|----------------------------------------------------------------|-------------------------------------------|---------------------------------------|
| <b>Primers used for in-frame deletions</b>                     |                                           |                                       |
| 5'motA_U -484                                                  | CAGGAACAGCAC <b>gcatgc</b> CACCATCGGCCG   | 5' region for deletion of <i>motA</i> |
| 3'motA_U 24                                                    | AACGATGCCGAT <b>ctgca</b> GAACATAGTGTG    |                                       |
| 5'motA_D 765                                                   | GCCCAAATCTCG <b>ctgca</b> ATCGGTCGCGGC    | 3' region for deletion of <i>motA</i> |
| 3'motA_D +378                                                  | GGCGGCCTCGGC <b>caagctt</b> GGCCGCTTCGGC  |                                       |
| 5'motB_U -484                                                  | CGGCTTGCCCG <b>gcatgc</b> CGGGCGCGTCGA    | 5' region for deletion of <i>motB</i> |
| 3'motB_U 24                                                    | CGGCTAGTTCG <b>ctgca</b> CCGCCATCGTGCT    |                                       |
| 5'motB_D 873                                                   | CCCGTACTGCC <b>ctgca</b> CTGTGACCGTTC     | 3' region for deletion of <i>motB</i> |
| 3'motB_D +484                                                  | CTCGGCCATGCC <b>caagctt</b> GGCGTGGCGGT   |                                       |
| 5'flgE_U -486                                                  | CCAGCCCAGCG <b>gcatgc</b> CTCGCTGAAGGT    | 5' region for deletion of <i>flgE</i> |
| 3' flgE_U 24                                                   | GAGCATGGCGCT <b>ctgca</b> GCTCATGACTGA    |                                       |
| 5' flgE_D 1752                                                 | GAACTCTTGAAT <b>ctgca</b> CGCTAATCATAG    | 3' region for deletion of <i>flgE</i> |
| 3' flgE_D +454                                                 | AGGGCGGTCCACA <b>agctt</b> CACCCTACC      |                                       |
| FlgH UP F                                                      | <b>agaattc</b> GTCTGGACCAACGCCAAC         | 5' region for deletion of <i>flgH</i> |
| FlgH UP R                                                      | cgagaacttcATAGCAGGACGACGCATGAT            |                                       |
| FlgH DN F                                                      | cctgctatGAAGTTCTCGCCCTTCTAGGC             | 3' region for deletion of <i>flgH</i> |
| FlgH DN R                                                      | a <b>GGATCC</b> GCTTGAGATCGCCTGACTTT      |                                       |
| 5'pilA_U -486                                                  | GAACCGGCGAGG <b>gcatgc</b> TACGAGGCCTGA   | 5' region for deletion of <i>pilA</i> |
| 3'pilA_U 24                                                    | GAAGCGCGTGAC <b>ctgca</b> GGTCATGACTTG    |                                       |
| 5'pilA_D 156                                                   | GTTTCGACGGCG <b>ctgca</b> ACCTAAGCCACT    | 3' region for deletion of <i>pilA</i> |
| 3'pilA_D +486                                                  | GTACAGCATGAA <b>agctt</b> GGCCGCCGCCA     |                                       |
| <b>Primers used for complementation strains constructs</b>     |                                           |                                       |
| flgE-3HindIII_F                                                | ACCCTCGTCCCC <b>agctt</b> TGTAGGAATTCA    | Cloning of <i>flgE</i> in pMR10       |
| flgE+3KpnI_R                                                   | AACTCAAGAATT <b>ggtacc</b> TGTTAAGCCCTA   |                                       |
| motB-9NdeI_F                                                   | GAAACG <b>catatg</b> GCGGTCAACAGCGAACAGC  | Cloning of <i>motB</i> in pMT630      |
| motB+18KpnI_R                                                  | CACGT <b>ggtacc</b> AGAACGGTCACAGGCCGTCG  |                                       |
| pleD-9NdeI_F                                                   | GAAACG <b>catatg</b> AGCGCCCGGATCCTCGTCCG | Cloning of <i>pleD</i> in pMT630      |
| pleD+18KpnI_R                                                  | CCACGT <b>ggtacc</b> CGTGCTCAGGCGGCCCTTG  |                                       |
| <b>Primers used for cysteine knock-in strains construction</b> |                                           |                                       |
| fljK5'                                                         | GGCAC <b>gaattc</b> CGAGCTGACGACCGTTCAG   | <i>fljK</i> sequencing                |
| fljK3                                                          | CAGGCTC <b>aggatcc</b> AGGACGAAGACTGGTTG  |                                       |
| fljKT176C+                                                     | GACGACCACCTCGtgcTTCACCACGGCCGC            | <i>fljK</i> T176C point mutation      |
| fljKT176C-                                                     | GCGGCCGTGGTGA <b>agca</b> CGAGGTGGTCGTC   |                                       |
| fljKT103C+                                                     | GGCCGCTTCCGACTgcTCGCTGAACACCGC            | <i>fljK</i> T103C point mutation      |
| fljKT103C-                                                     | GCGGTGTT <b>agca</b> GTCGGAAGCGGCC        |                                       |
| M13 reverse                                                    | AACAGCTATGACCATG                          | pSKII plasmid sequencing              |
| T7 promoter                                                    | TAATACGACTCACTATAGGG                      |                                       |

Uppercase matches genome sequence. Lower case bases are either restriction sites (bold), overlap with the opposite fragment, or point mutations in the sequence.

## SUPPLEMENTARY MOVIE LEGEND

**Movie S1. The FJK-cys mutation does not affect motility.** Flagellar filaments were labeled using AF488-mal and visualized by fluorescence microscopy in real-time using a PDMS flow device. RAM capture imaging was used to capture cell swimming at a rate of 9.8 frames per second.

**Movie S2. Comparison of rotating and non-rotating flagellar filaments in liquid medium.** Flagellar filaments were labeled using AF488-mal and visualized by fluorescence microscopy in real-time using a PDMS flow device. RAM capture imaging was used to capture flagellum rotation at a rate of 5 frames per second. The white arrows indicate non-rotating flagella. The flagellum on the right of the screen is stationary for the duration of the video, while the flagellum on the left is rotating until the appearance of the white arrow.

**Movie S3. Obstructed flagellum filament under a PYE agarose pad.** Cells were imaged under PYE 0.8% agarose pads using phase contrast microscopy, and flagella and holdfasts were stained using AF488-mal and AF594-WGA, respectively. The first panel shows phase contrast of a predivisional cell, the second panel shows a flagellum and a holdfast labeled with AF488-mal, the third panel shows a holdfast labeled with AF594-WGA, and the fourth panel is an overlay of all three channels. Time-lapse images were taken every 2 min. The flagellum remains non-motile for the duration of the experiment. Cell division occurs at 14 min, and subsequent holdfast synthesis at 24 min, 10 min after cell division has occurred.

## SUPPLEMENTARY REFERENCES

- Abel, S., T. Bucher, M. Nicollier, I. Hug, V. Kaefer, P. Abel Zur Wiesch & U. Jenal, (2013) Bi-modal distribution of the second messenger c-di-GMP controls cell fate and asymmetry during the caulobacter cell cycle. *PLoS Genet* **9**: e1003744.
- Aldridge, P. & U. Jenal, (1999) Cell cycle-dependent degradation of a flagellar motor component requires a novel-type response regulator. *Mol Microbiol* **32**: 379-391.
- Aldridge, P., R. Paul, P. Goymer, P. Rainey & U. Jenal, (2003) Role of the GGDEF regulator PleD in polar development of *Caulobacter crescentus*. *Mol Microbiol* **47**: 1695-1708.
- Duerig, A., S. Abel, M. Folcher, M. Nicollier, T. Schwede, N. Amiot, B. Giese & U. Jenal, (2009) Second messenger-mediated spatiotemporal control of protein degradation regulates bacterial cell cycle progression. *Genes Dev* **23**: 93-104.
- Ely, B. & T.W. Ely, (1989) Use of pulsed field gel electrophoresis and transposon mutagenesis to estimate the minimal number of genes required for motility in *Caulobacter crescentus*. *Genetics* **123**: 649-654.
- Fiebig, A., J. Herrou, C. Fumeaux, S.K. Radhakrishnan, P.H. Viollier & S. Crosson, (2014) A cell cycle and nutritional checkpoint controlling bacterial surface adhesion. *PLoS Genet* **10**: e1004101.
- Gober, J.W. & L. Shapiro, (1992) A developmentally regulated *Caulobacter* flagellar promoter is activated by 3' enhancer and IHF binding elements. *Mol Biol Cell* **3**: 913-926.
- Hardy, G.G., R.C. Allen, E. Toh, M. Long, P.J. Brown, J.L. Cole-Tobian & Y.V. Brun, (2010) A localized multimeric anchor attaches the *Caulobacter* holdfast to the cell pole. *Mol Microbiol* **76**: 409-427.
- Marks, M.E., C.M. Castro-Rojas, C. Teiling, L. Du, V. Kapatral, T.L. Walunas & S. Crosson, (2010) The genetic basis of laboratory adaptation in *Caulobacter crescentus*. *J Bacteriol* **192**: 3678-3688.
- Poindexter, J.S., (1964) Biological Properties and Classification of the *Caulobacter* Group. *Bacteriol Rev* **28**: 231-295.
- Roberts, R.C., C. Toochinda, M. Avedissian, R.L. Baldini, S.L. Gomes & L. Shapiro, (1996) Identification of a *Caulobacter crescentus* operon encoding *hrcA*, involved in negatively regulating heat-inducible transcription, and the chaperone gene *grpE*. *J Bacteriol* Sprecher, K.S., I. Hug, J. Nesper, E. Potthoff, M.A. Mahi, M. Sangermani, V. Kaefer, T. Schwede, J. Vorholt & U. Jenal, (2017) Cohesive Properties of the *Caulobacter crescentus* Holdfast Adhesin Are Regulated by a Novel c-di-GMP Effector Protein. *mBio* **8**.
- Thanbichler, M., A.A. Iniesta & L. Shapiro, (2007) A comprehensive set of plasmids for vanillate- and xylose-inducible gene expression in *Caulobacter crescentus*. *Nucleic Acids Res* **35**: e137.

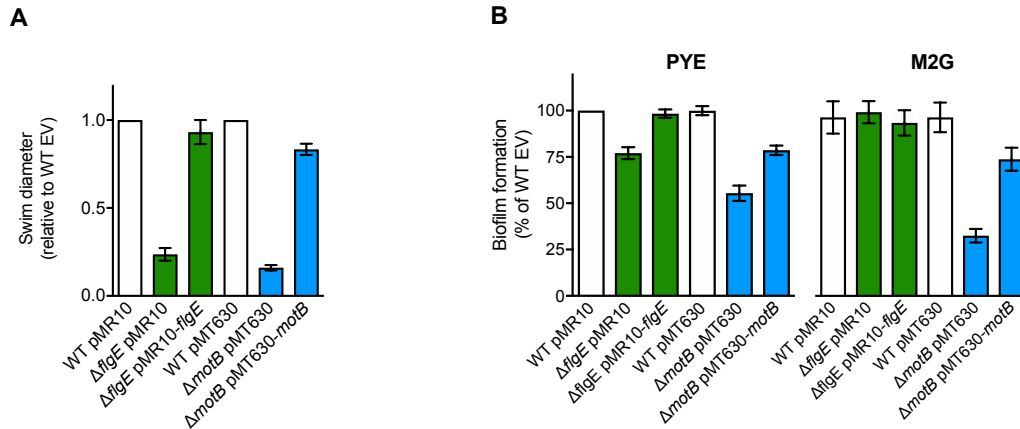

**Fig. S1:** (A) Motility in low percentage agar plates. 0.3% agar PYE plate containing 5  $\mu$ g/ml kanamycin for pMR10 plasmids and 5  $\mu$ g/ml kanamycin + 50 mM vanillate for pMT630 plasmids. Results are expressed as the swim diameter relative to CB15 WT empty vector. (B) Biofilm formation in 24-well plates (after 16 h incubation at 30°C) by *C. crescentus* CB15 WT empty vector (pMR10 or pMT630),  $\Delta$ flgE, and  $\Delta$ motB mutant complemented strains in PYE and M2G 5  $\mu$ g/ml kanamycin for pMR10 plasmids and 5  $\mu$ g/ml kanamycin + 50 mM vanillate for pMT630 plasmids. Results are expressed as a percentage of WT empty vector biofilm formation. Error bars represent the SEM of at least three independent replicates.

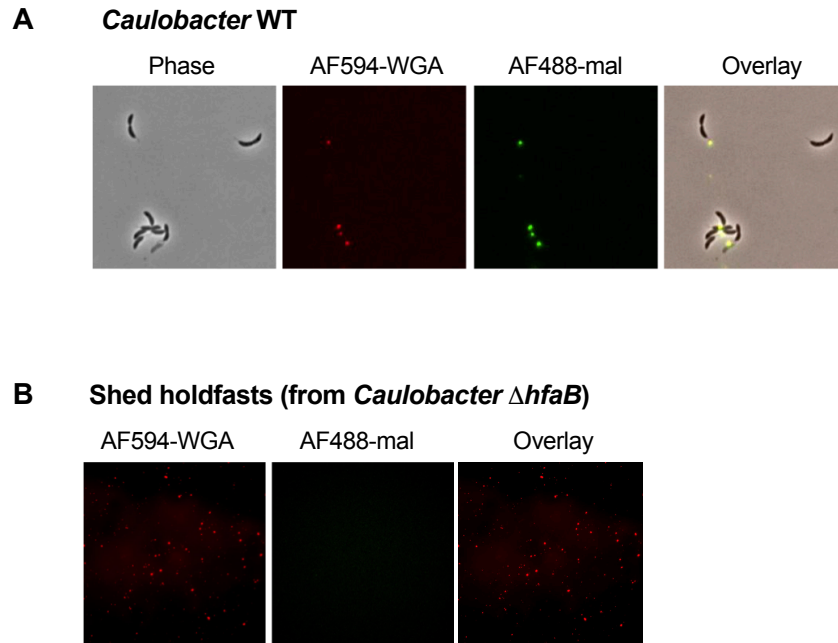

**Fig. S2:** Staining of *C. crescentus* WT (A, top panels) and purified holdfasts (B, bottom panels) using AF488-mal and AF594-WGA.

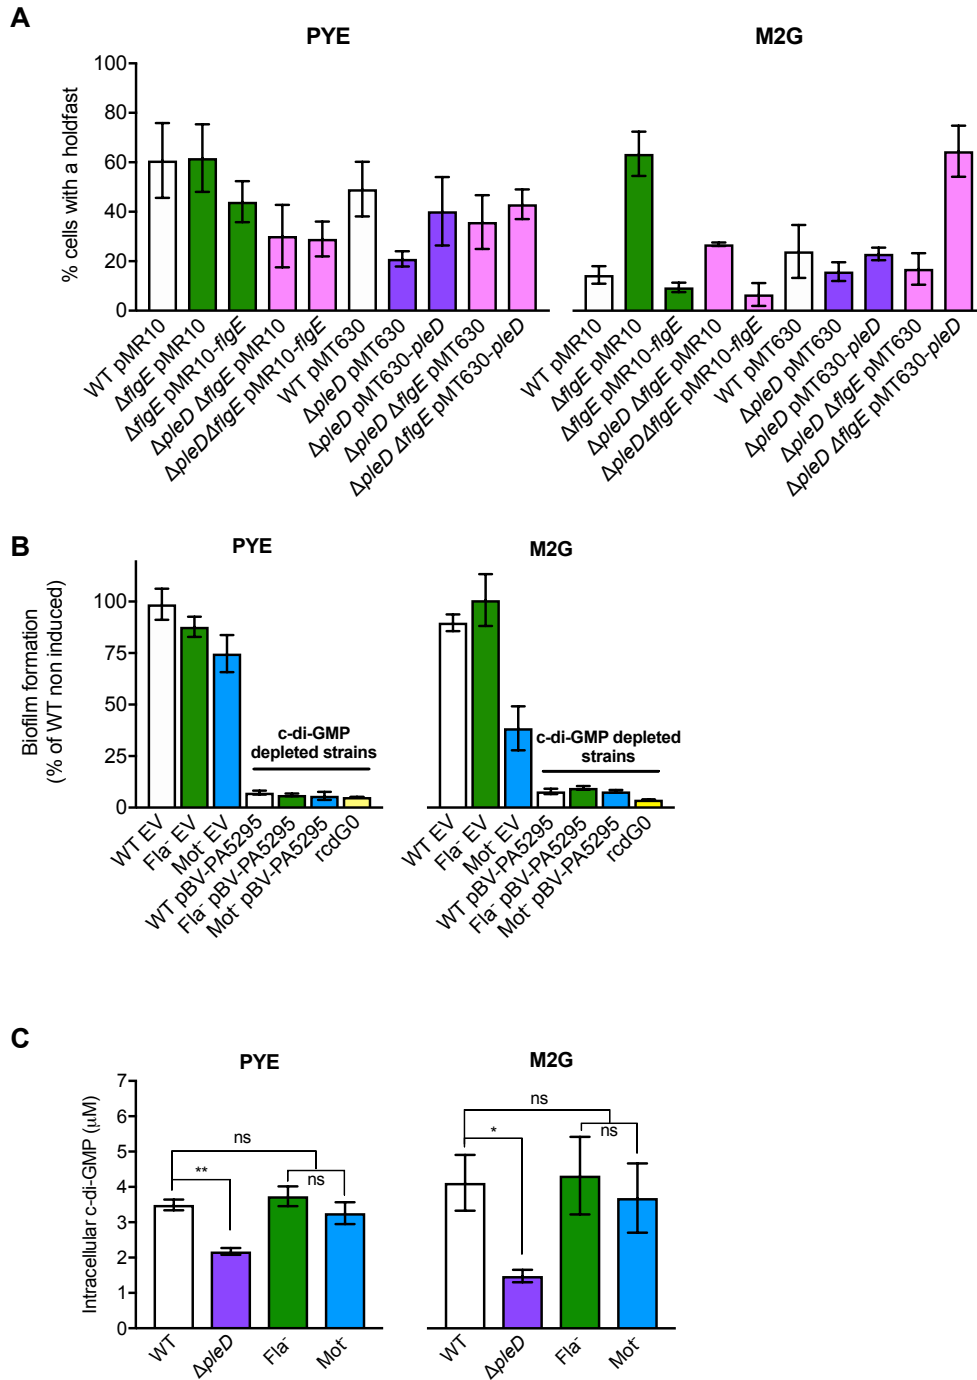

**Fig. S3:** (A) Quantification of cells harboring a holdfast in mixed populations grown to exponential phase. Cells are grown in PYE or M2G medium containing 5  $\mu$ g/ml kanamycin. Results are expressed as the average of three independent replicates (more than 300 cells per replicate); the error bars represent the SEM. (B) Biofilm formation in 24-well plates by cells overexpressing a phosphodiesterase (PA5295 from *P. aeruginosa*). *C. crescentus* CB15 WT,  $\Delta$ *flgE*, and  $\Delta$ *motB* mutants harboring the pMT335 empty vector (EV) or the PDE overexpressing vector (pBV-PA5295) were grown in PYE (left) or M2G (right) containing 15  $\mu$ g/ml gentamycin + 50 mM vanillate. Results are expressed as a percentage of WT empty vector biofilm formation. Error bars represent the SEM of three independent replicates. (C) Intracellular c-di-GMP quantification for the indicated strains and conditions. Error bars represent the SEM of at least 4 independent replicates. Statistical comparisons are calculated using Student's unpaired t-tests. \*\*  $P < 0.01$ ; \*  $P < 0.1$ ; ns = not significant.



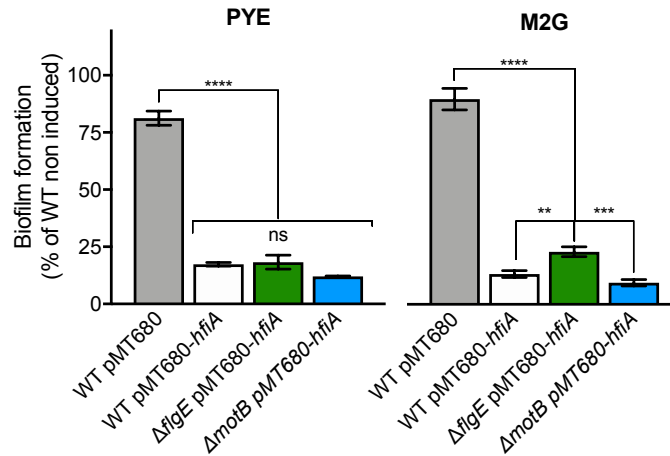

**Fig. S4:** Static biofilm formation in 24-well plates by *C. crescentus* CB15 WT,  $\Delta flgE$  and  $\Delta motB$  expressing *hfiA* ectopictly under the control of the *xyIX* promoter. The results are expressed as the percentage of inhibition of the induced cultures (by addition of 0.3% xylose overnight) compared to the non-induced ones. The error bars represent the SEM of independent duplicates run in triplicates. Statistical comparisons are calculated using Student's unpaired t-tests. \*\*\*\*  $P < 0.0001$ ; \*\*\*  $P < 0.001$ ; \*\*  $P < 0.01$ ; ns = not significant.
